# Supplementary material for: The long noncoding RNA HOTAIR activates the Hippo pathway by directly binding to SAV1 in renal cell carcinoma
Source: PubMed Central journal article supplement (PMC5601682; doi:10.18632/oncotarget.17414), 2017-04-25
Supplement: oncotarget-08-58654-s001.pdf [file oncotarget-08-58654-s001.pdf]

## The long noncoding RNA HOTAIR activates the Hippo pathway by directly binding to SAV1 in renal cell carcinoma

### MATERIALS AND METHODS

#### Primer Sequence for Quantitative Real time Polymerase Chain Reaction

HOTAIR: 5'-GGTAGAAAAAGCAACCACGAAGC-3'  
Reverse: 5'-ACATAAACCTCTGTCTGTGAGTGCC-3'

SAV1 5'-CTCTTGAGCGAGAAGGACTTCC-3'  
Reverse: 5'-GAGGTACACTAGGAGCACAGG-3'

MST1 5'-CCTTGGTGCTACACAACAGAC-3'  
Reverse: 5'-CAGACCTTGGTTCGAGGAACTT-3'

MST2 5'-CTTTGGTCCGATGATTTACCG-3'  
Reverse: 5'-GGATGCTGTAAAAGTTGTGTTGC-3'

LATS1 5'-AATTTGGGACGCATCATAAAGCC-3'  
Reverse: 5'-TCGTGAGGATCTTGGTAACTC-3'

LATS2 5'-TGGCACCTACTCCCACAG-3'  
Reverse: 5'-CCAAGGGCTTTCTTCATCT-3'

MOB1 5'-CAGCAGCCGCTCTTCTAAAAC-3'  
Reverse: 5'-CCTCAGGCAACATAACAGCTTG-3'

YAP1 5'-CGCTCTTCAACGCCGTC-3'  
Reverse: 5'-AGTACTGGCCTGTCCGGGAGT-3'

GAPDH 5'-GAGTCAACGGATTTGGTCGT-3'  
Reverse: 5'-GACAAGCTTCCCGTTCTCAG-3'

#### Primer for Methylation Analysis

Forward: 5'-GYGGATTATGGTTTTGGTT-3'  
Reverse: 5'-TTTTCTTTCRAAACAAACATCCT-3'

#### Sequence for HOTAIR si-RNA

Forward: 5'-GAGGCGCUAAUUAUUGAUTT-3'  
Reverse: 5'-AUCAAUUAUAGCGCCUUTT-3'

#### HOTAIR expressing Sequence:

Forward: 5'-cCCGCTCGAGCCAGTTCTCAGGCGAGAGC-3';  
Reverse : 5'-CGGGATCCTTTATATTCACCACATGTAAAACCTT-3'

SAV1 Overexpression plasmid was purchased from Bio link company (Shanghai China)
